# Supplementary material
Source: publisher figshare collection journal article supplement (https://gsajournals.figshare.com/ndownloader/files/14645222)
Supplement: Supplementary file 1 [file 14645222]

## Sheet: DAB110.vcf.rare.VarTable.txt
Table S4. Candidate suppressor mutations identified by targeted sequencing of 62 cold-resistant U4-cs1 yeast strains
strain	pick#	days	chrom	position	name	HGVS_C	HGVS_P*	variant reads	total reads	% variant
DAB110	T-2	14	chrVIII	431886	PRP8	n.5063C>G	p.Pro1688Arg	229	229	100
DAB111	T-3	14	chrVIII	431334	PRP8	n.5615C>G	p.Thr1872Arg	258	259	99
DAB116	P-2	17	chrVIII	431334	PRP8	n.5615C>A	p.Thr1872Lys	290	291	99
DAB117	Q-2	17	chrVI	155731	SAD1	n.143G>T	p.Cys48Phe	148	148	100
DAB118	R-1	17	chrVI	155731	SAD1	n.143G>T	p.Cys48Phe	146	146	100
DAB119	C-1	19	chrVI	155731	SAD1	n.143G>T	p.Cys48Phe	251	251	100
DAB120	F-1	19	chrVI	155730	SAD1	n.144C>G	p.Cys48Trp	134	134	100
DAB121	O-3	19	chrVIII	431334	PRP8	n.5615C>G	p.Thr1872Arg	297	298	99
DAB123	T-6	19	chrVI	155660	SAD1	n.213_214insTATTATCAGGGGAGAAAT	p.Tyr66_His71dup	81	81	100
DAB123	T-6	19	chrVI	155664	SAD1	n.209_210insTGG	p.Arg70delinsSerGly	84	84	100
DAB124	I-1	21	chrV	534947	BRR2	n.1075G>T	p.Gly359Cys	204	205	99
DAB125	I-2	21	chrVI	155731	SAD1	n.143G>T	p.Cys48Phe	115	115	100
DAB126	J-1	21	chrV	535138	BRR2	n.884G>T	p.Arg295Ile	170	170	100
DAB127	J-2	21	chrII	346629	PRP6	n.673A>G	p.Lys225Glu	79	79	100
DAB128	P-3	21	chrVII	667068	PRP31	n.728C>T	p.Ala243Val	68	68	100
DAB129	P-4	21	chrVI	155730	SAD1	n.144C>G	p.Cys48Trp	124	125	99
DAB130	Q-3	21	chrVI	155723	SAD1	n.151A>C	p.Thr51Pro	106	106	100
DAB131	Q-4	21	chrVIII	431334	PRP8	n.5615C>A	p.Thr1872Lys	332	333	99
DAB132	R-2	21	chrVI	155731	SAD1	n.143G>T	p.Cys48Phe	138	138	100
DAB133	R-3	21	chrVIII	434586	PRP8	n.2363A>C	p.Glu788Ala	192	192	100
DAB134	D-1	24	chrXI	124350	SNU114	n.1834C>A	p.Pro612Thr	113	120	94
DAB135	F-2	24	chrVIII	433378	PRP8	n.3571C>G	p.Pro1191Ala	117	118	99
DAB136	G-2	24	chrV	534947	BRR2	n.1075G>T	p.Gly359Cys	197	197	100
DAB137	J-3	24	chrVI	154781	SAD1	n.1093G>A	p.Glu365Lys	87	87	100
DAB138	I-3	24	chrVI	155731	SAD1	n.143G>T	p.Cys48Phe	87	87	100
DAB139	O-4	24	chrVIII	434367	PRP8	n.2582A>C	p.Gln861Pro	153	153	100
DAB140	O-5	24	chrVI	154946	SAD1	n.928C>A	p.Gln310Lys	159	159	100
DAB141	P-5	24	chrVI	155731	SAD1	n.143G>T	p.Cys48Phe	131	132	99
DAB142	Q-5	24	chrVI	155723	SAD1	n.151A>C	p.Thr51Pro	143	143	100
DAB143	R-4	24	chrII	346779	PRP6	n.523G>T	p.Asp175Tyr	110	118	93
DAB144	F-3	32	chrVIII	433652	PRP8	n.3297C>A	p.Asn1099Lys	262	274	95
DAB145	I-4	32	chrV	535154	BRR2	n.868G>A	p.Glu290Lys	177	178	99
DAB146	I-5	32	chrXI	124350	SNU114	n.1834C>A	p.Pro612Thr	132	132	100
DAB147	J-4	32	chrVIII	433652	PRP8	n.3297C>A	p.Asn1099Lys	239	240	99
DAB148	J-5	32	chrXII	366289	SNR6	n.55G>T	not applicable	76	76	100
DAB149	K-2	32	chrVIII	432049	PRP8	n.4900C>T	p.Leu1634Phe	275	276	99
DAB150	K-3	32	chrV	535168	BRR2	n.854T>A	p.Ile285Lys	147	147	100
DAB151	L-2	32	chrVIII	433377	PRP8	n.3572C>T	p.Pro1191Leu	104	104	100
DAB152	L-3	32	chrVI	154789	SAD1	n.1085C>A	p.Thr362Lys	118	118	100
DAB153	R-5	32	chrVIII	433652	PRP8	n.3297C>A	p.Asn1099Lys	377	395	95
DAB154	D-2	40	chrVIII	433652	PRP8	n.3297C>A	p.Asn1099Lys	296	307	96
DAB155	G-3	40	chrVI	154572	SAD1	n.1302A>T	p.Leu434Phe	90	102	88
DAB156	K-4	40	chrVIII	433652	PRP8	n.3297C>A	p.Asn1099Lys	273	277	98
DAB157	L-4	40	chrVI	154789	SAD1	n.1085C>A	p.Thr362Lys	138	138	100
DAB158	L-5	40	none
DAB159	B-1	45	chrVIII	432030	PRP8	n.4919C>A	p.Thr1640Lys	288	289	99
DAB160	C-2	45	chrV	535138	BRR2	n.884G>T	p.Arg295Ile	171	172	99
DAB161	D-3	45	none
DAB162	G-4	45	none
DAB163	G-5	45	none
DAB164	K-5	45	none
DAB165	L-6	45	none
DAB166	B-2	54	none
DAB167	C-3	54	none
DAB168	C-4	54	none
DAB169	D-4	54	chrVI	155416	SAD1	n.458C>A	p.Thr153Asn	385	385	100
DAB170	D-5	54	none
DAB171	F-4	54	none
DAB172	F-5	54	none
DAB173	B-3	64	none
DAB174	B-4	64	none
DAB175	B-5	64	none
DAB176	C-5	64	none
* Highlighted mutations illustrate temporal clustering (see text).
